Huot et *al.*

**IgG-aggregates rapidly up-regulate FcγRI expression at the surface of human neutrophils in a FcγRII-dependent fashion:**

**A crucial role for FcγRI in the generation of reactive oxygen species.**

Sandrine Huot<sup>1,3</sup>, Cynthia Laflamme<sup>1,3</sup>, Paul R. Fortin<sup>2,3</sup>, Eric Boilard<sup>1,3</sup>,

and Marc Pouliot<sup>1,3,4</sup>

<sup>1</sup> Département de microbiologie et immunologie, Faculté de Médecine de l'Université Laval, Centre de Recherche du CHU de Québec-Université Laval, Québec City, QC, Canada.

<sup>2</sup> Division de Rhumatologie, Département de Médecine, CHU de Québec-Université Laval, Québec City, QC, Canada.

<sup>3</sup> Axe maladies infectieuses et immunitaires, Centre de Recherche du CHU de Québec-Université Laval, Québec City, QC, Canada.

<sup>4</sup> Correspondence: Centre de Recherche du CHU de Québec-Université Laval (CHUL), 2705 Laurier boulevard, Office T1-49, Quebec City, QC, Canada, G1V 4G2.

E-mail: [Marc.Pouliot@crchul.ulaval.ca](mailto:Marc.Pouliot@crchul.ulaval.ca)

The authors confirm that there are no conflicts of interest.

Huot et *al.*

## **Nonstandard abbreviations list**

7-AAD: 7-Aminoactinomycin D

ACTB: Actin beta

ADA: Adenosine deaminase

ERK: Extracellular signal-regulated kinase

FcγR: Fc gamma receptor

fMLP: Formyl-methionyl-leucyl phenylalanine

G-CSF: Granulocyte-colony stimulating factor

GM-CSF: Granulocyte-macrophage colony-stimulating factor

GPI: Glycosylphosphatidylinositol

GSK: Glycogen-synthase-kinase

HA-IgGs: Heat-aggregated IgGs

HBSS: Hank's Balanced Salt Solution

HOCl: Hypochlorous acid

IFN: Interferon

IgG: Immunoglobulin G

IL: Interleukin

ITAM: Immunoreceptor Tyrosine-based Activation Motif

LPS: Lipopolysaccharide

MCP: Monocyte chemoattractant protein

MEK: Mitogen-activated protein/extracellular signal-regulated kinase kinase

MIP: Macrophage inflammatory protein

MMP-9: Matrix metalloproteinase 9, also known as gelatinase B

MPO: Myeloperoxidase

NET: Neutrophil extracellular trap

PI3K: Phosphatidylinositol 3-kinase

PI-PLC: Phosphatidylinositol-Specific Phospholipase

PKC: Protein kinase C

PLC: Phospholipase C

ROS: Reactive oxygen species

SEM: Standard error of the mean

Huot et *al.*

Syk: Spleen tyrosine kinase

TLR4: Toll-like receptor 4

TNF: Tumor necrosis factor

Huot et al.

## Abstract

Autoimmune complexes are an important feature of several autoimmune diseases such as lupus, as they contribute to tissue damage through the activation of immune cells. Neutrophils, key players in lupus, interact with immune complexes through Fc gamma receptors (FcγR). Incubation of neutrophils with aggregated-IgGs caused degranulation and increased the surface expression of FcγRI within minutes in a concentration-dependent fashion. After 30 min, IgG aggregates (1 mg/ml) up-regulated FcγRI by  $4.95 \pm 0.45$ -fold. FcγRI-positive neutrophils reached  $67.24\% \pm 6.88\%$  on HA-IgGs stimulated neutrophils, from  $3.12\% \pm 1.62\%$  in non-stimulated cells, ranking IgG-aggregates among the most potent known agonists. FcγRIIa, and possibly FcγRIIIa, appeared to mediate this up-regulation. Also, FcγRI-dependent signaling proved necessary for reactive oxygen species (ROS) production in response to IgG-aggregates. Finally, combinations of bacterial materials with aggregates dramatically boosted ROS production. This work suggests FcγRI as an essential component in the response of human neutrophils to immune complexes leading to the production of ROS, which may help explain how neutrophils contribute to tissue damage associated with immune complex-associated diseases, such as lupus.

Huot *et al.*

## Introduction

Immune complex diseases, such as rheumatoid arthritis and systemic lupus erythematosus, encompass a diverse group of inflammatory conditions characterized by antigen-antibody deposition. Typical manifestations are glomerulonephritis, synovitis, and dermal vasculitis (1). Activation of neutrophils, resulting from the interaction with immune complexes, leads to the production of oxygen-free radicals and the release of lysosomal enzymes (2), which may bring about tissue inflammation and organ damage.

Phagocytes, including neutrophils, bind to immune complexes with their Fc gamma receptors (FcγRs), serving as molecular links between antibody and immunological responses (3). Neutrophils express the transmembrane FcγRIIa (CD32a) and FcγRIIIb (CD16b), expressed at 10-fold higher density than FcγRIIa [Reviewed in (4)]. FcγRIIIb is also present, albeit to a lesser degree (4). Both FcγRIIIb and FcγRIIa are low-affinity receptors, exclusive to higher primates, and displaying specialized context-dependent functions in neutrophil recruitment (5, 6). Unique to neutrophils, FcγRIIIb is the only Fc receptor anchored by a glycosylphosphatidylinositol (GPI)-linker to the plasma membrane, and lacking a cytoplasmic domain (7). Despite the absence of a known molecular adaptor, multiple studies have reported that FcγRIIIb can induce cellular responses such as Ca<sup>2+</sup> mobilization (8), nuclear factor activation (9), removal of immune complexes (10) and NET formation (11). Recently, the expression of FcγRIIIa (CD16a) was demonstrated in neutrophils (12). FcγRIIIa and FcγRIIIb share 96% sequence identity in their extracellular IgG-binding regions (7). FcγRIIIa is a classic activating receptor that, upon stimulation, associates with an Immunoreceptor Tyrosine-based Activation Motif (ITAM)-signaling system. Thus, FcγRIII signaling in neutrophils is still not completely understood. On the other hand, FcγRIIa, with its integrated signaling ITAM, has been identified as an essential

Huot *et al.*

mediator of destructive antibody-based inflammation in autoimmunity (5) and is necessary for neutrophil recruitment within glomerular capillaries following IgG deposition (13, 14).

FcγRI (CD64) is the only high-affinity receptor of immunoglobulin G (IgG) in humans (15). Like FcγRIIIa, FcγRI is an 'activator' using an intracellular ITAM-mediated signaling system to promote phagocytosis, respiratory burst, antibody-dependent cell-mediated cytotoxicity, cytokine production, and NETosis (3, 16, 17). Nonetheless, FcγRI surface expression is negligible in circulating healthy individuals' neutrophils and is stored in intracellular vesicles (18). Modulation of FcγRI by cytokines or growth factors was reported more than three decades ago. IFN-γ increased FcγRI on neutrophils after 18 hrs of incubation (19). *In vivo*, but not *in vitro* application of granulocyte-colony stimulating factor (G-CSF) increased FcγRI expression on neutrophils within days, and potentiated their tumor cell killing capabilities (20, 21). Also, neutrophil FcγRI expression increases in complications associated with bacterial infections (22-24). Currently, neutrophil FcγRI serves as a sensitive diagnostic marker for early-onset neonatal infections (25).

While monocyte FcγRI expression is positively associated with immune inflammation and lupus (26-28), its expression on circulating neutrophils is barely elevated in patients with lupus, unless an infection is present (29). Moreover, the implication of neutrophil FcγRI in responses to immune complexes is not documented.

In this paper, we investigated the impact of aggregated-IgGs, used as a model of immune complexes, on neutrophil activation. We show that the engagement of FcγRs by IgG-aggregates up-regulates FcγRI at the surface of human neutrophils from intracellular stores. Moreover, we assessed the necessity of FcγRI activation for downstream cellular responses. This work reveals FcγRI as an essential component for ROS production following the engagement of FcγRs.

Huot et al.

## Materials & Methods

*Materials.* Dextran-500, Lipopolysaccharide (LPS from *Escherichia coli* 0111: B40), Actinomycin D (from *Streptomyces* sp.), Formyl-methionyl-leucyl phenylalanine (fMLP), Wortmannin (from *Penicillium fumiculosum*), Phorbol 12-myristate 13-acetate (PMA), Luminol, Isoluminol, Cycloheximide and SB216763 were purchased from Sigma-Aldrich (Oakville, ON, Canada). Lymphocyte separation medium was purchased from Wisent (St-Bruno, QC, Canada). AS605240, U0126, and U73122 were obtained from Cayman Chemical (Ann Arbor, MI, USA). PRT-060318 was obtained from Selleckchem (Houston, TX, USA). Gö6976 and PP-2 were purchased from Calbiochem (San Diego, CA, USA). Recombinant human granulocyte (G), granulocyte-macrophage (GM) colony-stimulating factor (CSF), interferon (IFN)-gamma ( $\gamma$ ), and tumor necrosis factor (TNF) were purchased from PeproTech (Rocky Hill, NJ, USA). Nexinhib20 was obtained from Tocris (Oakville, ON, Canada). IFN-alpha ( $\alpha$ ) was purchased from PBL Assay Science (Piscataway, NJ, USA). Human immunoglobulins G (IgGs): Lyophilized human IgGs, purified from human plasma or serum by fractionation (purity of greater than 97% as determined by SDS-PAGE analysis) were purchased from Innovative Research, Inc. (Novi, MI, USA). Phosphatidylinositol-Specific Phospholipase C (PI-PLC), 7-Aminoactinomycin D (7-AAD) and SYTOX green were purchased from Thermo Fisher Scientific (Burlington, ON, Canada). Cytochrome C was obtained from Bio Basic (Markham, ON, Canada). Human MPO and human Lactoferrin ELISA kits were purchased from Assaypro (St. Charles, MO, USA). MMP-9 DuoSet ELISA was obtained from R&D Systems, Inc. (Oakville, ON, Canada). A list of compounds, molecular targets, concentrations, and solvents, is presented in **Table 2**. A list of agonists and concentrations is presented in **Table 3**.

Huot *et al.*

*Antibodies.* Purified mouse anti-human FcγRIII (3G8), Alexa Fluor®-labeled 647 mouse anti-human CD16 (3G8), PE-labeled mouse anti-human FcγRIIIb (Clone CLB-gran11.5), purified mouse anti-human FcγRI (10.1), V450-labeled mouse anti-human FcγRI (10.1) and PE-labeled mouse anti-human FcγRII (Clone FLI8.26, also known as 8.26), were purchased from BD Biosciences (San Jose, CA, USA). Monoclonal anti-human FcγRIIa (IV.3) was obtained from Bio X Cell (West Lebanon, NH, USA). This blocking antibody recognizes a native extracellular epitope of FcγRIIa (30).

*Ethics.* All experiments involving human tissues received approval from the Université Laval ethics committee.

*Isolation of human neutrophils.* Informed consent was obtained in writing from all donors. Data collection and analyses were performed anonymously. Neutrophils were isolated as originally described (31) with modifications (32). Briefly, venous blood collected on isocitrate anticoagulant solution from healthy volunteers was centrifuged (250 x g, 10 min), and the resulting platelet-rich plasma was discarded. Leukocytes were obtained following sedimentation of erythrocytes in 2% Dextran-500. Neutrophils were then separated from other leukocytes by centrifugation on a 10 ml lymphocyte separation medium. Contaminating erythrocytes were removed using 20 sec of hypotonic lysis. Purified granulocytes (> 95% neutrophils, < 5% eosinophils) contained less than 0.2% monocytes, as determined by esterase staining. Viability was greater than 98%, as determined by trypan blue dye exclusion. The entire cell isolation procedure was carried out under sterile conditions at room temperature.

*Cell incubations.* Neutrophils were resuspended at a concentration of  $10 \times 10^6$  cells/ml at 37°C in Hank's Balanced Salt Solution (HBSS) containing 10 mM HEPES pH 7.4, 1.6 mM  $\text{Ca}^{2+}$  and no  $\text{Mg}^{2+}$ , 10% human serum, and supplemented with 0.1 U/ml adenosine deaminase (ADA) to



Huot et al.

prevent the accumulation of endogenous adenosine in the medium, thus minimizing the previously demonstrated modulating effects of adenosine on inflammatory factor production by neutrophils (33-35).

*Preparation of heat-aggregated IgGs.* Heat-aggregated (HA)-IgGs were essentially prepared as originally described (36), with modifications. Briefly, soluble aggregates were prepared daily by resuspending IgGs in HBSS 1X at a concentration of 25 mg/ml, and heating at 63°C for 75 min.

*Flow Cytometry.* Following appropriate treatments, cell suspensions were spin and resuspended in HBSS containing human Fc-Block (BD Biosciences). Cells were incubated with V450-labeled mouse anti-human FcγRI (CD64), Alexa Fluor®-labeled 647 mouse anti-human FcγRIII (CD16) and PE-labeled mouse anti-human FcγRII (CD32) for 30 min in the dark. HBSS and 7-AAD (viability) were added (400 μl), and samples were analyzed using a FACS Canto II flow cytometer with FACSDiva software, version 6.1.3 (BD Biosciences). Cell gating strategy and representative data are presented in **Supplemental Figure S1**.

*Viability.* Neutrophil viability was assessed using a FITC Annexin V Apoptosis Detection Kit (BD Biosciences). Briefly, cell pellets were suspended in 100 μL of binding buffer. Annexin V and propidium iodide (5 μl each) were added to each sample. After 15 min, 400 μL of binding buffer was added, and samples were analyzed by flow cytometry. Gating was determined using control samples labeled individually with either Annexin V or propidium iodide.

*Degranulation.* A) *Surface markers.* Neutrophils were processed for flow cytometry as described above. Surface levels of: CD63 (primary granules); CD66b (secondary granules), CD11b, (secondary, tertiary granules, and secretory vesicles); CD10, and CD35 (secretory vesicles) were monitored (37). B) *Matrix proteins.* Cell-free supernatants were stored at -20°C until their

Huot et al.

analysis for myeloperoxidase (MPO), lactoferrin, and gelatinase (MMP-9) content, with commercially-available ELISAs, according to the manufacturers' instructions.

*NET production.* Performed essentially as in (38). Briefly, neutrophils ( $5 \times 10^4$  cells/well) in HBSS containing HEPES (10 mM),  $\text{Ca}^{2+}$  (1.6 mM) and supplemented with ADA (0.1 U/ml) were aliquoted (200  $\mu\text{l}$ ) into 96 well plates and left to settle for 30 min at 37°C. When present, Nexinhib20 or 10.1 antibody was added 30 min before adding HA-IgGs, or PMA (10 nM) as a positive control for NET induction (38). Plates were incubated at 37°C (5%  $\text{CO}_2$ ) for up to 4 hrs; SYTOX green (5  $\mu\text{M}$  final concentration), a cell-impermeable nucleic acid stain, was added at indicated times and NET formation was evaluated by measuring the fluorescence (excitation/emission: 504/523 nm) in each well after subtraction of the background fluorescence.

*Cytokine/chemokine release.* Cell-free supernatants were stored at  $-20^\circ\text{C}$  until their analysis for chemokine/cytokine content with a multiplexed bead-based immunoassay (BD™ Cytometric Bead Array), using FCAP Array software version 3.0 (BD Biosciences). CXCL8 (IL-8), CCL2 (MCP-1), CCL3 (MIP-1alpha), TNF, IL-1alpha, IL-1beta, IL-6, and IFN-alpha were monitored.

*Production of reactive oxygen species.* Reactive oxygen species (ROS) production was measured as previously described (39) with modifications. Briefly, neutrophils were resuspended at  $1 \times 10^6$  cells/ml in the presence of either 2.5% membrane non-permeable cytochrome c (v/v), 10  $\mu\text{M}$  of membrane-permeable luminol, or 10  $\mu\text{M}$  of membrane non-permeable isoluminol. Neutrophils (200  $\mu\text{l}$ ) were placed in 96-well microplates, treated as indicated, and stimulated with 1 mg/ml of free IgGs or 1 mg/ml of HA-IgGs. Suspensions were incubated at 37°C in the microplate reader Infinite M1000 PRO with i-control 2.0 software (Tecan, Morrisville, NC, USA). Luminescence intensity (luminol and isoluminol) and optical density (cytochrome C; 550 nm with a correction at 540 nm) were monitored every 5 min. The amount of superoxide anion produced in the

Huot et *al.*

cytochrome C reduction assay was calculated using the formula published by Dahlgren and Karlsson (40).

*Statistical analysis.* Statistical analysis was performed using GraphPad PRISM version 8 (GraphPad Software, San Diego, CA, USA). Where applicable, values are expressed as the mean  $\pm$  standard error of the mean (SEM). Statistical analysis was performed using a two-tailed Student's t-test (paired comparisons). Differences were considered significant (marked by an asterisk\*) when  $p < 0.05$ .

Huot et al.

## Results

### Heat-aggregated IgGs rapidly up-regulate FcγRI expression on neutrophils.

In order to gain insights about the implication of neutrophils in inflammatory events resulting from interactions with immune complexes, we incubated human neutrophils with heat-aggregated (HA)-IgGs and measured the surface expression of activation markers by flow cytometry. Such aggregates are a good initial model of immune complexes, as they cause no bias based on the antigen (41). HA-IgGs significantly increased markers associated with maturity (CD10) (42) and adhesion (CD11b, CD15) (43, 44) (**Table 1**). CD11b is present on secondary, tertiary granules and secretory vesicles (45), thereby suggesting their exocytosis as well, although CD66b, expressed in secondary granules, was not affected. HA-IgGs had the strongest and comparable impact on FcγRI (CD64) and primary granule marker CD63 (Relative fluorescence intensities of  $4.61 \pm 0.79$  and  $3.99 \pm 0.55$ , respectively). In contrast, HA-IgGs decreased the expression of FcγRII (CD32), as reported earlier (46), and FcγRIII (CD16). Such an up-regulation of neutrophil-FcγRI is unprecedented and warrants further investigation.

HA-IgGs increased FcγRI in a concentration-dependent and saturable fashion (**Fig. 1A**). At the highest concentration, the proportion of FcγRI-positive neutrophils reached 75%, from 2.5% on resting cells (**Fig. 1C**). HA-IgGs up-regulated the surface expression of FcγRI within minutes and remained elevated for at least 60 min (**Fig. 1B, D**). Free IgGs had little to no effect on FcγRI expression. Conversely, HA-IgGs decreased the signal intensity of FcγRII and FcγRIII, by 63% and 47%, respectively, compared to non-stimulated cells (**Fig. 1E, I**), but did not affect percentages of positive cells (**Fig. 1G, H, K, L**). Overall, the impact of HA-IgGs on FcγRs expression was potent and occurred within minutes (**Fig. 1B, F, J**).

Huot et al.

### **HA-IgGs are a strong stimulus for the up-regulation of FcγRI on human neutrophils.**

Injections of IFN-γ or G-CSF have been reported to up-regulate FcγRI on neutrophils, upon lengthy exposures (19-21). We incubated neutrophils with LPS, IFN-α, IFN-γ, fMLP, TNF, G-CSF, or GM-CSF, alone or in combination with HA-IgGs, and measured FcγRs expression. By themselves, none of these factors had any significant effect on FcγRI expression within 30 min (**Fig. 2A, white bars**), while HA-IgGs led to a 4.9-fold increase (n=4) in FcγRI mean fluorescence intensity (**Fig. 2A, black bars**); FcγRI-positive neutrophils reached 67% on HA-IgGs stimulated neutrophils, from 3% in non-stimulated cells (**Fig. 2B**). When combined with HA-IgGs, LPS and GM-CSF had significantly potentiating effects on FcγRI surface expression. While all factors tended to increase percentages of FcγRI-positive neutrophils, significance was not reached. GM-CSF slightly increased the basal expression of FcγRIII (**Fig. 2D**); LPS and GM-CSF potentiated the decreasing-effect of HA-IgGs on FcγRIII. Finally, none of these factors affected FcγRII expression (**Fig. 2C**). Overall, in these conditions, HA-IgGs constitute a potent stimulus for FcγRI up-regulation.

### **FcγRIIa, but not FcγRIIIb, is instrumental in the up-regulation of FcγRI by HA-IgGs.**

We initially assessed the possible implication of FcγRIII in the up-regulation of neutrophil-FcγRI by HA-IgGs. The FcγRIII-blocking monoclonal antibody 3G8 did not prevent FcγRI up-regulation. Moreover, the FcγRIIIb-specific monoclonal antibody 11.5 significantly enhanced FcγRI up-regulation, so did the shedding of FcγRIIIb by PI-PLC (47) (**Fig. 3A**), arguing against

Huot *et al.*

a significant role for FcγRIIIb in FcγRI up-regulation, but leaving the possibility open for FcγRIIIa.

As expected, the FcγRIIa-blocking monoclonal antibody IV.3 effectively prevented the up-regulation of FcγRI, by approximately 60%. Simultaneous blockade of FcγRIII and FcγRIIa did not result in more inhibition. Together, these results confirm a role for FcγRIIa, but not for FcγRIIIb, in FcγRI up-regulation.

### **Syk and PI3K mediate the up-regulation of FcγRI by HA-IgGs.**

Both FcγRIIa and FcγRIIIa are activators, signaling either through an intrinsic ITAM (FcγRIIa), or through association with an ITAM-containing gamma subunit (FcγRIIIa) (48). Tyrosine residues in the ITAM, phosphorylated by Src-family protein kinases, constitute anchoring sites for the spleen tyrosine kinase (Syk), the activation of which leads to stimulation of phosphatidylinositol 3-kinase (PI3K), phospholipase C $\gamma$  (PLC $\gamma$ ), ERK (extracellular signal-regulated kinase), and other downstream pathways (49). Despite an inhibitory trend, the Src-family kinase inhibitor PP-2 only had a modest impact on FcγRI up-regulation (**Fig. 3B**). In contrast, the Syk inhibitor PRT-060318, and two structurally distinct PI3K inhibitors, Wortmannin and AS605240, each prevented the up-regulation of FcγRI, approximately by half. Other downstream pathways, including PLC (U73122), PKC (Gö6976), MEK/ERK (U0126), or glycogen-synthase-kinase (GSK)-3 (SB216763), did not appear to be involved. Finally, the protein synthesis inhibitor cycloheximide also had no sizeable impact.

### **FcγRI is pre-formed, stored in intracellular granules.**

Huot et al.

The rapid up-regulation of FcγRI suggested granule localization for FcγRI. To confirm, we used the neutrophil exocytosis inhibitor Nexinhib20. As shown in **Figure 3C**, Nexinhib20 effectively reversed FcγRI increase, in a concentration-dependent fashion and up to 66±7%, at 10 μM. The effect of Nexinhib20 on CD63 was comparable. With a rapid, protein-synthesis independent up-regulation by HA-IgGs and a profile of expression following that of CD63, these results support a primary granule localization for pre-formed FcγRI, in resting neutrophils.

### **HA-IgGs induce degranulation, MCP-1 release, and intracellular ROS production.**

Given this robust and rapid up-regulation in FcγRI surface expression, we evaluated the functional implication of FcγRI in some meaningful neutrophil responses, namely: cell viability, degranulation, NET formation, cytokine release, and ROS production. HA-IgGs did not decrease neutrophil viability (**Suppl. Fig. S2**); in fact, HA-IgGs delayed early apoptosis after 24 hrs and 48 hrs. The blockade of FcγRI with the FcγRI-specific 10.1 antibody had no significant impact. In degranulation experiments, HA-IgGs provoked significant, rapid release of MPO, lactoferrin, and MMP-9 in cell-free supernatants (**Suppl. Fig. S3**); FcγRI blockade had no inhibitory effect. In contrast, Nexinhib20 completely inhibited degranulation. HA-IgGs did not induce NET formation (**Suppl. Fig. S4**). Regarding the release of cytokines, HA-IgGs specifically stimulated the release of CCL-2 (MCP-1) (**Suppl. Fig. S5**). This observation is of interest because in the serum and urine of patients with lupus, MCP-1 levels are elevated compared to healthy controls; moreover, those levels positively correlate with lupus activity (50). Here also, FcγRI blockade did not reverse the HA-IgG-triggered release of MCP-1.

Huot et al.

Also, we evaluated the production of ROS elicited by HA-IgG-stimulated neutrophils, by monitoring: the overall MPO-dependent production of HOCl with luminol, the extracellular-only MPO-dependent production of HOCl with isoluminol, and the extracellular-only release of O<sub>2</sub><sup>-</sup> reactive species with cytochrome C. As shown in **Figure 4**, the incubation of neutrophils with HA-IgGs resulted in the intracellular-only generation of ROS, as reported earlier (39). Free-IgGs had little to no effect.

### **FcgRI signaling is necessary for ROS production by HA-IgG-stimulated neutrophils.**

The FcgRIIIb-specific shedding enzyme PI-PLC diminished ROS production elicited by HA-IgGs, by approximately 35% (**Fig. 5A**). Antibodies against FcgRIIa (IV.3), FcgRIII (3G8), FcgRIIIb (11.5), or Fc-Block, each prevented ROS production by more than 80%. Similarly, pre-incubating neutrophils with the 10.1 antibody blocked ROS production, showing the involvement of FcgRI also in this cellular function. While the up-regulation of FcgRI involved FcgRIIa, ROS production appeared to necessitate the engagement of all FcgRs monitored: FcgRI, FcgRIIa, FcgRIIIa, and FcgRIIIb. Inhibition of Syk, PI3K pathways, all but obliterated ROS production (**Fig. 5B**). Blockades of PLC, PKC, or MEK pathways also partly diminished ROS production. Nexinhib20 prevented ROS production, in a concentration-dependent fashion, but with higher potency than for FcgRI expression (**Fig. 5C**). Taken together, these results show the necessity of many pathways, including FcgRI signaling, for optimal ROS production.

### **Bacterial components magnify FcgRI-dependent ROS production.**



Huot et al.

Given the potentiation of FcγRI expression by fMLP and LPS, we activated neutrophils with these, and other agonists, and measured ROS production. While having no effect by themselves, fMLP and LPS each had an enormous amplifying impact on the ROS production elicited by HA-IgGs up to 6-fold (**Fig. 6A**). For LPS, a TLR4 ligand, as little as 1 ng/ml was sufficient to increase ROS production (**Fig. 6B**). Blocking FcγRI, or addition of Nexinhib20, obliterated the effects of LPS and fMLP, reducing the production of ROS by at least 90%. Together, these results identify conditions that can be encountered by circulating neutrophils, combining the up-regulation of FcγRI and engagement of TLR4 or fMLP receptors, leading to massive ROS production.

Schematics, summarizing the main findings of the present study, are presented in **Figure 7**.

Huot et al.

## Discussion

In the present study, HA-IgGs rapidly up-regulated the surface expression of FcγRI on human neutrophils by mobilizing it from intracellular stores. In this regard, HA-IgGs proved to be more potent than any of the previously reported agonists (20, 21, 51). Among the several cell responses assessed, we showed that FcγRI engagement was specifically essential for ROS production. ~~Also, additional stimuli synergized with HA-IgGs, magnifying ROS production.~~ These results reveal key-elements in our understanding of interactions between immune complexes and neutrophils.

The up-regulation of FcγRI by HA-IgGs was dependent on FcγRIIa engagement and activation of Syk and PI3K, in line with an FcγR-dependent event (52, 53). None of the inhibitors blocked FcγRI up-regulation by more than half, suggesting that several pathways work parallel, leading to degranulation. PLC, PKC, GSK-3, and MEK pathways, also downstream of ITAM signaling and leading to Ca<sup>2+</sup> elevation and gene expression (54), were unnecessary, indicating that FcγRI exocytosis is regulated by earlier events, upstream of those pathways.

In the present conditions, FcγRI up-regulation occurred within seconds, without the need for *de novo* protein synthesis, which points towards different mechanisms than in previous studies where patients or neutrophils were exposed to agonists for several hours, or days (20, 21, 51). Pre-formed FcγRI appears to be localized in intracellular granules, as suggested by the use of Nexinhib20, an inhibitor of granule exocytosis (55), which efficiently prevented the up-regulation of FcγRI. Moreover, hand-in-hand up-regulation of FcγRI and CD63, suggesting that primary granules may harbor FcγRI. Specialized imaging techniques will help in clarifying its precise localization. Also, the concealment of FcγRI inside resting cells may constitute a

Huot *et al.*

checkpoint that prevents neutrophils in circulation from getting unduly stimulated; rapid exposure of this high-affinity receptor releases fuller responsiveness when conditions require it, upon interaction with immobilized immune complexes, for example.

Complexed-IgGs have long been known to bind to neutrophils through FcγRs and stimulate cellular responses, including ROS production (56). Both FcγRIIa and FcγRIIIb have been implicated in this process, often by using blocking antibodies IV.3 and 3G8, respectively (39). Using similar and additional tools, our results around the expression of FcγRI also supported the involvement of FcγRIIa, but not that of FcγRIIIb. The FcγRIIIb-specific 11.5 blocking antibody, actually enhanced FcγRI up-regulation, as did PI-PLC, a FcγRIIIb-specific shedding enzyme. Moreover, the 3G8 blocking antibody (57), which does not discriminate between the two FcγRIII isoforms, did not affect FcγRI up-regulation, supporting the concept of a decoy role for FcγRIIIb (12, 58, 59) in this process. Results leave the possibility of a role for FcγRIIIa. This point may be relevant because FcγRIIIa, like FcγRI, is a classic activating receptor associating with an ITAM-signaling system; it might mediate many events previously attributed to FcγRIIIb (60). Alternatively, the balance in expression between the two isoforms might influence cellular responsiveness (60). Tools better suited for the specific study of FcγRIIIa will help in clarifying this issue.

ROS production could be prevented by blocking each of the receptors mentioned above. On the other hand, blocking FcγRI prevented ROS production elicited by HA-IgGs while it did not affect viability, degranulation, or cytokine release. This fact suggests a substantial and specific role of FcγRI in regulating ROS production. Also, inhibitors of PI3K, PLC, PKC, MEK1/2, each efficiently prevented this cell's response. Moreover, Nexinhib20, an agent preventing Rab27a-JFC1 interactions, also inhibited the exocytosis of FcγRI, adding to its recognized anti-

Huot *et al.*

inflammatory properties (55). This profile of results clearly shows that many signaling pathways are to be solicited for ROS production, suggesting a tight regulation of this critical cell function.

One of the most salient findings presented here was the potentiation of HA-IgG-elicited ROS production by bacterial materials. Indeed, fMLP or LPS enhanced this cell's response by manifold. On the one hand, these results show that the minute presence of microorganisms can substantially impact neutrophil activation and could profoundly affect the course of an inflammatory reaction, possibly leading to an overt, ill-regulated response. On the other hand, they indicate a crucial role for FcγRI in the process since preventing its engagement virtually obliterated ROS production, even in the presence of fMLP or LPS.

The present study finds particular relevance in the context of immune complex-mediated inflammatory disorders where current models include the capture of neutrophils by endothelial cells (61), on which immobilized immune complexes can elicit the rapid attachment of neutrophils (62) and feed inflammatory flares associated with human autoimmune diseases, such as glomerulonephritis, arthritis, rheumatic fever, and lupus. Neutrophils binding to deposited immune complexes in the kidneys of patients with lupus nephritis, one of the significant complications of lupus, may contribute to its pathogenesis (63-66) through inflammatory responses such as the biosynthesis of lipid mediators, antibody-dependent cell phagocytosis, MCP-1 release, and ROS production (64). While such functions are designed for host defense, disordered responses may instead lead to tissue damage (67). In the context of autoimmune diseases, even minor microbial contamination could steer neutrophil reactivity in harmful directions. Further studies targeting FcγRI, using distinct approaches, will help mark the involvement of this receptor in neutrophil biology.

Huot et *al.*

In conclusion, the present study reveals an essential role of neutrophil-FcγRI in cellular activation in response to IgG aggregates, particularly for the production of ROS. Moreover, cross-talk between FcγRI and other signaling pathways may have a profound impact on this cell's response. Together, these results provide molecular insights into how neutrophil inflammatory responses can become deleterious.

Huot et *al.*

## **Author's contributions**

**SH:** Performed most experiments, analyzed the data, wrote parts of the manuscript.

**CL:** Performed some of the experiments, including all surface marker measurements.

**PF:** Designed parts of the study.

**EB:** Designed parts of the study.

**MP:** Designed the study, analyzed the data, wrote the manuscript.

## **Acknowledgments**

This work was funded by a grant from the Canadian Institutes of Health Research (CIHR) to MP (grant number: MOP220733). SH is the recipient of a studentship from the Fonds de Recherche du Québec-Santé (FRQS). EB is the recipient of a new investigator award from the CIHR and is a Canadian National Transplant Research Program (CNTRP) researcher. PRF is the recipient of a tier 1 Canada Research Chair on Systemic Autoimmune Rheumatic Diseases.

Huot et al.

## References

1. Immune Complex Diseases. In *eLS* pp. 1-9
2. Nguyen, G. T., Green, E. R., and Meccas, J. (2017) Neutrophils to the ROScUE: Mechanisms of NADPH Oxidase Activation and Bacterial Resistance. *Front Cell Infect Microbiol* **7**, 373
3. Rosales, C. (2017) Fcγ Receptor Heterogeneity in Leukocyte Functional Responses. *Front Immunol* **8**, 280
4. Wang, Y., and Jonsson, F. (2019) Expression, Role, and Regulation of Neutrophil Fcγ Receptors. *Front Immunol* **10**, 1958
5. Tsuboi, N., Asano, K., Lauterbach, M., and Mayadas, T. N. (2008) Human neutrophil Fcγ receptors initiate and play specialized nonredundant roles in antibody-mediated inflammatory diseases. *Immunity* **28**, 833-846
6. Bruhns, P. (2012) Properties of mouse and human IgG receptors and their contribution to disease models. *Blood* **119**, 5640-5649
7. Zhang, Y., Boesen, C. C., Radaev, S., Brooks, A. G., Fridman, W. H., Sautes-Fridman, C., and Sun, P. D. (2000) Crystal structure of the extracellular domain of a human Fcγ RIII. *Immunity* **13**, 387-395
8. Kimberly, R. P., Ahlstrom, J. W., Click, M. E., and Edberg, J. C. (1990) The glycosyl phosphatidylinositol-linked Fcγ RIIIPMN mediates transmembrane signaling events distinct from Fcγ RII. *J Exp Med* **171**, 1239-1255
9. Garcia-Garcia, E., Nieto-Castaneda, G., Ruiz-Saldana, M., Mora, N., and Rosales, C. (2009) FcγRIIA and FcγRIIIB mediate nuclear factor activation through separate signaling pathways in human neutrophils. *J Immunol* **182**, 4547-4556
10. Chen, K., Nishi, H., Travers, R., Tsuboi, N., Martinod, K., Wagner, D. D., Stan, R., Croce, K., and Mayadas, T. N. (2012) Endocytosis of soluble immune complexes leads to their clearance by FcγRIIIB but induces neutrophil extracellular traps via FcγRIIA in vivo. *Blood* **120**, 4421-4431
11. Aleman, O. R., Mora, N., Cortes-Vieyra, R., Uribe-Querol, E., and Rosales, C. (2016) Differential Use of Human Neutrophil Fcγ Receptors for Inducing Neutrophil Extracellular Trap Formation. *J Immunol Res* **2016**, 2908034

Huot et al.

12. Golay, J., Valgardsdottir, R., Musaraj, G., Giupponi, D., Spinelli, O., and Introna, M. (2019) Human neutrophils express low levels of FcγRIIIA, which plays a role in PMN activation. *Blood* **133**, 1395-1405
13. Ramsland, P. A., Farrugia, W., Bradford, T. M., Sardjono, C. T., Esparon, S., Trist, H. M., Powell, M. S., Tan, P. S., Cendron, A. C., Wines, B. D., Scott, A. M., and Hogarth, P. M. (2011) Structural basis for Fc γRIIa recognition of human IgG and formation of inflammatory signaling complexes. *J Immunol* **187**, 3208-3217
14. Nishi, H., Furuhashi, K., Cullere, X., Saggi, G., Miller, M. J., Chen, Y., Rosetti, F., Hamilton, S. L., Yang, L., Pittman, S. P., Liao, J., Herter, J. M., Berry, J. C., DeAngelo, D. J., Zhu, C., Tsokos, G. C., and Mayadas, T. N. (2017) Neutrophil FcγRIIIA promotes IgG-mediated glomerular neutrophil capture via Abl/Src kinases. *J Clin Invest* **127**, 3810-3826
15. van der Poel, C. E., Spaapen, R. M., van de Winkel, J. G., and Leusen, J. H. (2011) Functional characteristics of the high affinity IgG receptor, FcγRI. *J Immunol* **186**, 2699-2704
16. Lood, C., Arve, S., Ledbetter, J., and Elkon, K. B. (2017) TLR7/8 activation in neutrophils impairs immune complex phagocytosis through shedding of FcγRIIA. *J Exp Med* **214**, 2103-2119
17. Albanesi, M., Mancardi, D. A., Jonsson, F., Iannascoli, B., Fiette, L., Di Santo, J. P., Lowell, C. A., and Bruhns, P. (2013) Neutrophils mediate antibody-induced antitumor effects in mice. *Blood* **122**, 3160-3164
18. Sandilands, G. P., Ahmed, Z., Perry, N., Davison, M., Lupton, A., and Young, B. (2005) Cross-linking of neutrophil CD11b results in rapid cell surface expression of molecules required for antigen presentation and T-cell activation. *Immunology* **114**, 354-368
19. Perussia, B., Dayton, E. T., Lazarus, R., Fanning, V., and Trinchieri, G. (1983) Immune interferon induces the receptor for monomeric IgG1 on human monocytic and myeloid cells. *J Exp Med* **158**, 1092-1113
20. Repp, R., Valerius, T., Sandler, A., Gramatzki, M., Iro, H., Kalden, J. R., and Platzner, E. (1991) Neutrophils express the high affinity receptor for IgG (Fc γRI, CD64) after in vivo application of recombinant human granulocyte colony-stimulating factor. *Blood* **78**, 885-889



Huot et al.

21. Michon, J. M., Gey, A., Moutel, S., Tartour, E., Meresse, V., Fridman, W., and Teillaud, J. L. (1998) In vivo induction of functional Fc gammaRI (CD64) on neutrophils and modulation of blood cytokine mRNA levels in cancer patients treated with G-CSF (rMetHuG-CSF). *Br J Haematol* **100**, 550-556
22. Fjaertoft, G., Hakansson, L. D., Pauksens, K., Sisask, G., and Venge, P. (2007) Neutrophil CD64 (FcgammaRI) expression is a specific marker of bacterial infection: a study on the kinetics and the impact of major surgery. *Scand J Infect Dis* **39**, 525-535
23. Sack, U. (2017) CD64 expression by neutrophil granulocytes. *Cytometry B Clin Cytom* **92**, 189-191
24. Hoffmann, J. J. (2009) Neutrophil CD64: a diagnostic marker for infection and sepsis. *Clin Chem Lab Med* **47**, 903-916
25. Ng, P. C., Li, G., Chui, K. M., Chu, W. C., Li, K., Wong, R. P., Chik, K. W., Wong, E., and Fok, T. F. (2004) Neutrophil CD64 is a sensitive diagnostic marker for early-onset neonatal infection. *Pediatr Res* **56**, 796-803
26. Zhang, H., Li, L., and Liu, L. (2018) FcgammaRI (CD64) contributes to the severity of immune inflammation through regulating NF-kappaB/NLRP3 inflammasome pathway. *Life Sci* **207**, 296-303
27. Kikuchi-Taura, A., Yura, A., Tsuji, S., Ohshima, S., Kitatoube, A., Shimizu, T., Nii, T., Katayama, M., Teshigawara, S., Yoshimura, M., Kudo-Tanaka, E., Harada, Y., Matsushita, M., Hashimoto, J., and Saeki, Y. (2015) Monocyte CD64 expression as a novel biomarker for the disease activity of systemic lupus erythematosus. *Lupus* **24**, 1076-1080
28. Abd-Elhamid, Y. A., Eltanawy, R. M., Fawzy, R. M., Fouad, N. A., and Atlm, A. M. (2017) Expression of CD64 on Surface of Circulating Monocytes in Systemic Lupus Erythematosus Patients: Relation to Disease Activity and Lupus Nephritis. *Egypt J Immunol* **24**, 67-78
29. Ajmani, S., Singh, H., Chaturvedi, S., Mishra, R., Rai, M. K., Jain, A., Misra, D. P., and Agarwal, V. (2019) Utility of neutrophil CD64 and serum TREM-1 in distinguishing bacterial infection from disease flare in SLE and ANCA-associated vasculitis. *Clin Rheumatol* **38**, 997-1005

Huot et al.

30. Marois, L., Vaillancourt, M., Pare, G., Gagne, V., Fernandes, M. J., Rollet-Labelle, E., and Naccache, P. H. (2011) CIN85 modulates the down-regulation of Fc gammaRIIa expression and function by c-Cbl in a PKC-dependent manner in human neutrophils. *J Biol Chem* **286**, 15073-15084
31. Fiset, M. E., Gilbert, C., Poubelle, P. E., and Pouliot, M. (2003) Human neutrophils as a source of nociceptin: a novel link between pain and inflammation. *Biochemistry* **42**, 10498-10505
32. Pouliot, M., Fiset, M. E., Masse, M., Naccache, P. H., and Borgeat, P. (2002) Adenosine up-regulates cyclooxygenase-2 in human granulocytes: impact on the balance of eicosanoid generation. *J Immunol* **169**, 5279-5286
33. Cadieux, J. S., Leclerc, P., St-Onge, M., Dussault, A. A., Laflamme, C., Picard, S., Ledent, C., Borgeat, P., and Pouliot, M. (2005) Potentiation of neutrophil cyclooxygenase-2 by adenosine: an early anti-inflammatory signal. *J Cell Sci* **118**, 1437-1447
34. McColl, S. R., St-Onge, M., Dussault, A. A., Laflamme, C., Bouchard, L., Boulanger, J., and Pouliot, M. (2006) Immunomodulatory impact of the A2A adenosine receptor on the profile of chemokines produced by neutrophils. *FASEB J* **20**, 187-189
35. St-Onge, M., Flamand, N., Biarc, J., Picard, S., Bouchard, L., Dussault, A. A., Laflamme, C., James, M. J., Caughey, G. E., Cleland, L. G., Borgeat, P., and Pouliot, M. (2007) Characterization of prostaglandin E2 generation through the cyclooxygenase (COX)-2 pathway in human neutrophils. *Biochim Biophys Acta* **1771**, 1235-1245
36. Gale, R., Bertouch, J. V., Gordon, T. P., Bradley, J., and Roberts-Thomson, P. J. (1984) Neutrophil activation by immune complexes and the role of rheumatoid factor. *Ann Rheum Dis* **43**, 34-39
37. Yin, C., and Heit, B. (2018) Armed for destruction: formation, function and trafficking of neutrophil granules. *Cell Tissue Res* **371**, 455-471
38. Gray, R. D., Lucas, C. D., MacKellar, A., Li, F., Hiersemenzel, K., Haslett, C., Davidson, D. J., and Rossi, A. G. (2013) Activation of conventional protein kinase C (PKC) is critical in the generation of human neutrophil extracellular traps. *J Inflamm (Lond)* **10**, 12

Huot et al.

39. Fossati, G., Bucknall, R. C., and Edwards, S. W. (2002) Insoluble and soluble immune complexes activate neutrophils by distinct activation mechanisms: changes in functional responses induced by priming with cytokines. *Ann Rheum Dis* **61**, 13-19
40. Dahlgren, C., and Karlsson, A. (1999) Respiratory burst in human neutrophils. *J Immunol Methods* **232**, 3-14
41. Cloutier, N., Allaey, I., Marcoux, G., Machlus, K. R., Mailhot, B., Zufferey, A., Levesque, T., Becker, Y., Tessandier, N., Melki, I., Zhi, H., Poirier, G., Rondina, M. T., Italiano, J. E., Flamand, L., McKenzie, S. E., Cote, F., Nieswandt, B., Khan, W. I., Flick, M. J., Newman, P. J., Lacroix, S., Fortin, P. R., and Boilard, E. (2018) Platelets release pathogenic serotonin and return to circulation after immune complex-mediated sequestration. *Proc Natl Acad Sci U S A* **115**, E1550-E1559
42. Elghetany, M. T., Ge, Y., Patel, J., Martinez, J., and Uhrova, H. (2004) Flow cytometric study of neutrophilic granulopoiesis in normal bone marrow using an expanded panel of antibodies: correlation with morphologic assessments. *J Clin Lab Anal* **18**, 36-41
43. Khan, S. Q., Khan, I., and Gupta, V. (2018) CD11b Activity Modulates Pathogenesis of Lupus Nephritis. *Front Med (Lausanne)* **5**, 52
44. Wang, X., He, Z., Liu, H., Yousefi, S., and Simon, H. U. (2016) Neutrophil Necroptosis Is Triggered by Ligation of Adhesion Molecules following GM-CSF Priming. *J Immunol* **197**, 4090-4100
45. Zen, K., Utech, M., Liu, Y., Soto, I., Nusrat, A., and Parkos, C. A. (2004) Association of BAP31 with CD11b/CD18. Potential role in intracellular trafficking of CD11b/CD18 in neutrophils. *J Biol Chem* **279**, 44924-44930
46. Bengtsson, A. A., Tyden, H., and Lood, C. (2020) Neutrophil FcγRIIA availability is associated with disease activity in systemic lupus erythematosus. *Arthritis Res Ther* **22**, 126
47. Bzowska, M., Hamczyk, M., Skalniak, A., and Guzik, K. (2011) Rapid decrease of CD16 (FcγRIII) expression on heat-shocked neutrophils and their recognition by macrophages. *J Biomed Biotechnol* **2011**, 284759
48. Bruhns, P., and Jonsson, F. (2015) Mouse and human FcR effector functions. *Immunol Rev* **268**, 25-51
49. Takai, T. (2002) Roles of Fc receptors in autoimmunity. *Nat Rev Immunol* **2**, 580-592

Huot et al.

50. Zivkovic, V., Cvetkovic, T., Mitic, B., Stamenkovic, B., Stojanovic, S., Radovanovic-Dinic, B., and Jurisic, V. (2018) Monocyte chemoattractant protein-1 as a marker of systemic lupus erythematosus: an observational study. *Rheumatol Int* **38**, 1003-1008
51. Buckle, A. M., and Hogg, N. (1989) The effect of IFN-gamma and colony-stimulating factors on the expression of neutrophil cell membrane receptors. *J Immunol* **143**, 2295-2301
52. Zhang, Y., Hoppe, A. D., and Swanson, J. A. (2010) Coordination of Fc receptor signaling regulates cellular commitment to phagocytosis. *Proc Natl Acad Sci U S A* **107**, 19332-19337
53. Futosi, K., Fodor, S., and Mocsai, A. (2013) Reprint of Neutrophil cell surface receptors and their intracellular signal transduction pathways. *Int Immunopharmacol* **17**, 1185-1197
54. Giambelluca, M. S., Bertheau-Mailhot, G., Laflamme, C., Rollet-Labelle, E., Servant, M. J., and Pouliot, M. (2014) TNF-alpha expression in neutrophils and its regulation by glycogen synthase kinase-3: a potentiating role for lithium. *FASEB J* **28**, 3679-3690
55. Johnson, J. L., Ramadass, M., He, J., Brown, S. J., Zhang, J., Abgaryan, L., Biris, N., Gavathiotis, E., Rosen, H., and Catz, S. D. (2016) Identification of Neutrophil Exocytosis Inhibitors (Nexinhibs), Small Molecule Inhibitors of Neutrophil Exocytosis and Inflammation: DRUGGABILITY OF THE SMALL GTPase Rab27a. *J Biol Chem* **291**, 25965-25982
56. Babior, B. M. (1988) The respiratory burst oxidase. *Basic Life Sci* **49**, 815-821
57. Tamm, A., and Schmidt, R. E. (1996) The binding epitopes of human CD16 (Fc gamma RIII) monoclonal antibodies. Implications for ligand binding. *J Immunol* **157**, 1576-1581
58. Treffers, L. W., van Houdt, M., Bruggeman, C. W., Heineke, M. H., Zhao, X. W., van der Heijden, J., Nagelkerke, S. Q., Verkuijlen, P., Geissler, J., Lissenberg-Thunnissen, S., Valerius, T., Peipp, M., Franke, K., van Bruggen, R., Kuijpers, T. W., van Egmond, M., Vidarsson, G., Matlung, H. L., and van den Berg, T. K. (2018) Fc gamma RIIIb Restricts Antibody-Dependent Destruction of Cancer Cells by Human Neutrophils. *Front Immunol* **9**, 3124
59. Bonegio, R. G., Lin, J. D., Beaudette-Zlatanova, B., York, M. R., Menn-Josephy, H., and Yasuda, K. (2019) Lupus-Associated Immune Complexes Activate Human Neutrophils

Huot et al.

- in an FcγRIIA-Dependent but TLR-Independent Response. *J Immunol* **202**, 675-683
60. Patel, K. R., Roberts, J. T., and Barb, A. W. (2019) Multiple Variables at the Leukocyte Cell Surface Impact Fc γ Receptor-Dependent Mechanisms. *Front Immunol* **10**, 223
  61. Takano, K., Kaganoi, J., Yamamoto, K., Takahashi, A., Kido, T., and Sasada, M. (2000) Rapid and prominent up-regulation of high-affinity receptor for immunoglobulin G (Fc γ RI) by cross-linking of β 2 integrins on polymorphonuclear leukocytes. *Int J Hematol* **72**, 48-54
  62. Coxon, A., Cullere, X., Knight, S., Sethi, S., Wakelin, M. W., Stavrakis, G., Luscinskas, F. W., and Mayadas, T. N. (2001) Fc γ RIII mediates neutrophil recruitment to immune complexes. a mechanism for neutrophil accumulation in immune-mediated inflammation. *Immunity* **14**, 693-704
  63. Nishi, H., and Mayadas, T. N. (2019) Neutrophils in lupus nephritis. *Curr Opin Rheumatol* **31**, 193-200
  64. Jonsson, F., Mancardi, D. A., Albanesi, M., and Bruhns, P. (2013) Neutrophils in local and systemic antibody-dependent inflammatory and anaphylactic reactions. *J Leukoc Biol* **94**, 643-656
  65. Kaplan, M. J. (2011) Neutrophils in the pathogenesis and manifestations of SLE. *Nat Rev Rheumatol* **7**, 691-699
  66. Lorenz, G., and Anders, H. J. (2015) Neutrophils, Dendritic Cells, Toll-Like Receptors, and Interferon-α in Lupus Nephritis. *Semin Nephrol* **35**, 410-426
  67. Pricop, L., and Salmon, J. E. (2002) Redox regulation of Fcγ receptor-mediated phagocytosis: implications for host defense and tissue injury. *Antioxid Redox Signal* **4**, 85-95
  68. Turina, M., Miller, F. N., McHugh, P. P., Cheadle, W. G., and Polk, H. C., Jr. (2005) Endotoxin inhibits apoptosis but induces primary necrosis in neutrophils. *Inflammation* **29**, 55-63
  69. Takei, H., Araki, A., Watanabe, H., Ichinose, A., and Sendo, F. (1996) Rapid killing of human neutrophils by the potent activator phorbol 12-myristate 13-acetate (PMA)

Huot et *al.*

accompanied by changes different from typical apoptosis or necrosis. *J Leukoc Biol* **59**,  
229-240

Huot *et al.*

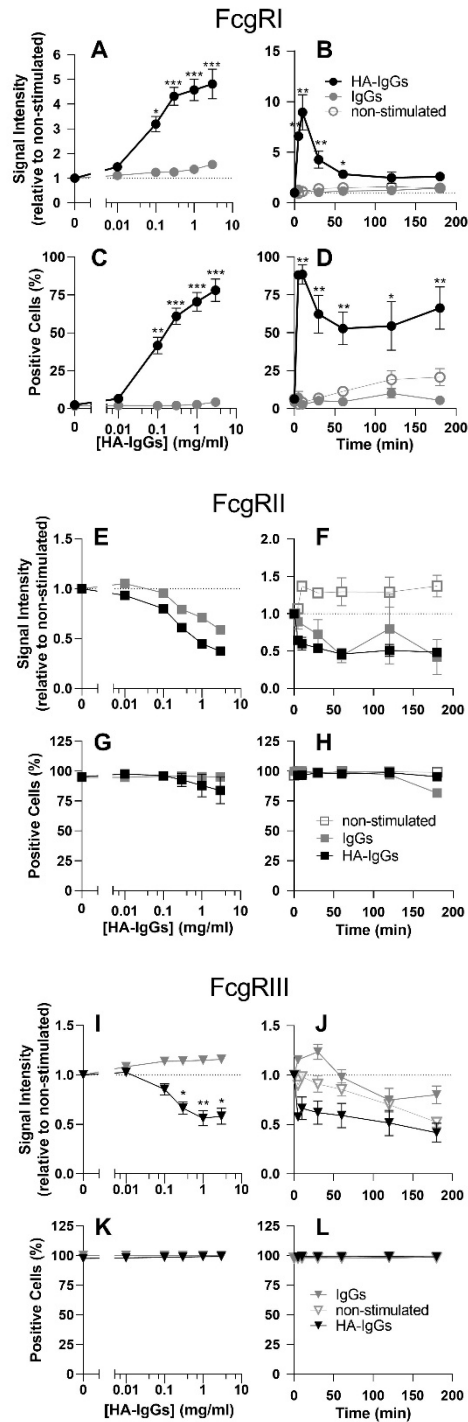

**Figure 1. HA-IgGs rapidly up-regulate FcγRI on human neutrophils, in a concentration-dependent fashion.** Neutrophils were incubated with indicated concentrations of heat-aggregated (HA)-IgGs, or free IgGs, for 30 min at 37°C (left panels), or for indicated times at 1 mg/ml (right panels). Surface expressions of FcγRI (A-D), FcγRII, (E-H), and FcγRIII (I-L) were measured by flow cytometry. Results are expressed as the fluorescence signal intensity relative to non-stimulated cells and are from n=4 experiments, each performed with neutrophils from different healthy donors. \*p<0.05, \*\*p<0.01, \*\*\*p<0.001

Huot et al.

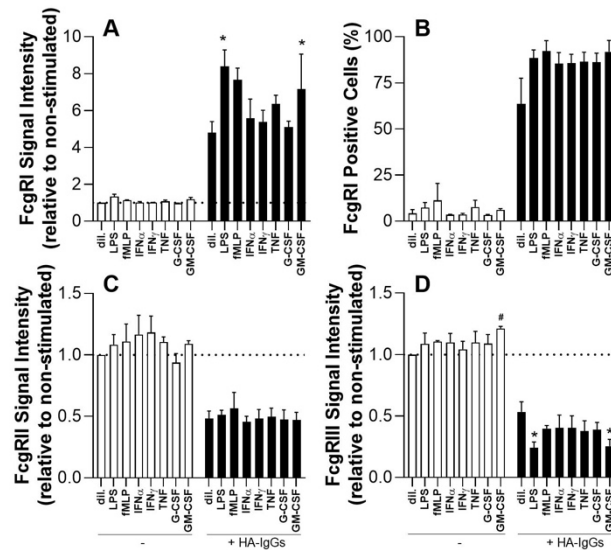

**Figure 2. HA-IgGs are a potent stimulus for FcγRI up-regulation in human neutrophils.** Cells were incubated with indicated agonists or diluent (dil.) for 15 min (37°C), then with HA-IgGs for 30 min. FcγRs expression was determined by flow cytometry. **A, C, D)** For each of the FcγR, results are expressed as the fluorescence signal intensity relative to non-stimulated cells (dil., white bars). **B)** Percentages of FcγRI-positive neutrophils. From n=4 experiments, each performed with neutrophils from different donors. Mean  $\pm$  SEM. \*Statistically different from HA-IgGs alone (dil., black bar), or #from resting cells. p<0.05



Huot et al.

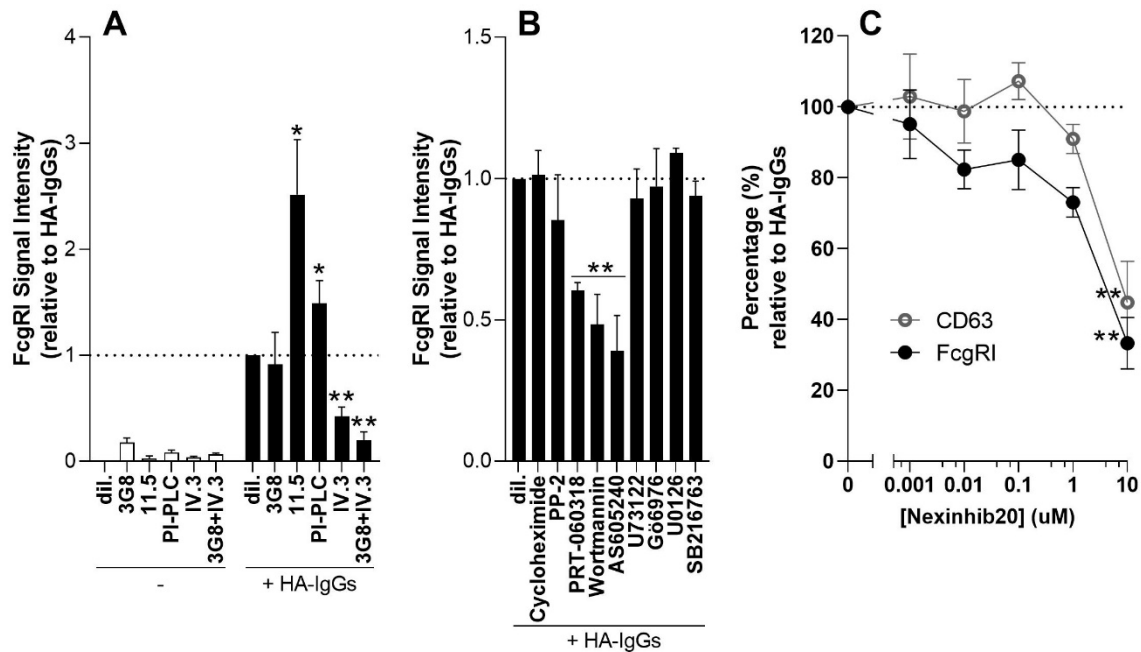

**Figure 3. Signaling pathways involved in the up-regulation by HA-IgGs.** **A)** Neutrophils were incubated with the following whole antibodies: 3G8 (FcγRIII), 11.5 (FcγRIIIb), IV.3 (FcγRII), or with PI-PLC for 15 min (37°C), then stimulated with HA-IgGs for an additional 30 min. **B)** Neutrophils were incubated with indicated pharmacological inhibitors before stimulation with HA-IgGs. FcγRI surface expression was measured by flow cytometry. Results are expressed as the fluorescence signal intensity relative to HA-IgGs alone (dil., black bar). **C)** Neutrophils were incubated with indicated concentrations of Nexinhib20 for 15 min before stimulation with HA-IgGs. Mean ± SEM, n=3. Significantly higher\*, and significantly lower\*\* than HA-IgGs alone, p<0.05.

Huot *et al.*

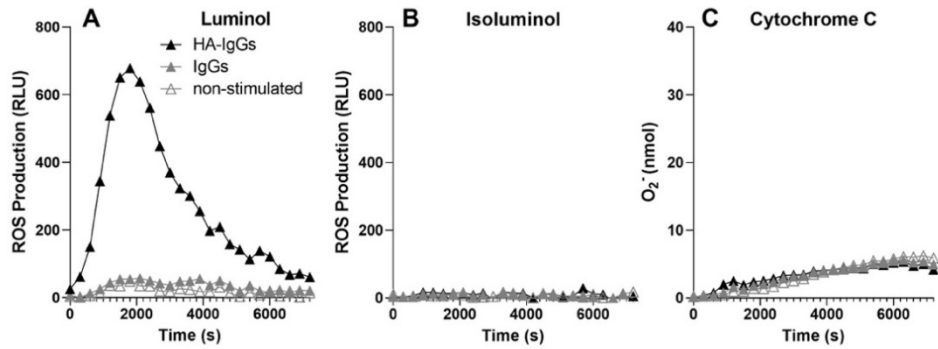

**Figure 4. Human neutrophils stimulated with HA-IgGs produce intracellular reactive oxygen species.** Neutrophils were incubated in indicated conditions, in the presence of either **A**) 10  $\mu$ M luminol, **B**) 10  $\mu$ M isoluminol, or **C**) 2.5% cytochrome C (v/v). ROS production was measured (37°C) simultaneously by luminescence intensity (luminol and isoluminol) and optical density (cytochrome C) every 5 min and for the indicated times. Results are from one experiment, representative of n=4 experiments performed in identical conditions with neutrophils from different donors.

Huot *et al.*

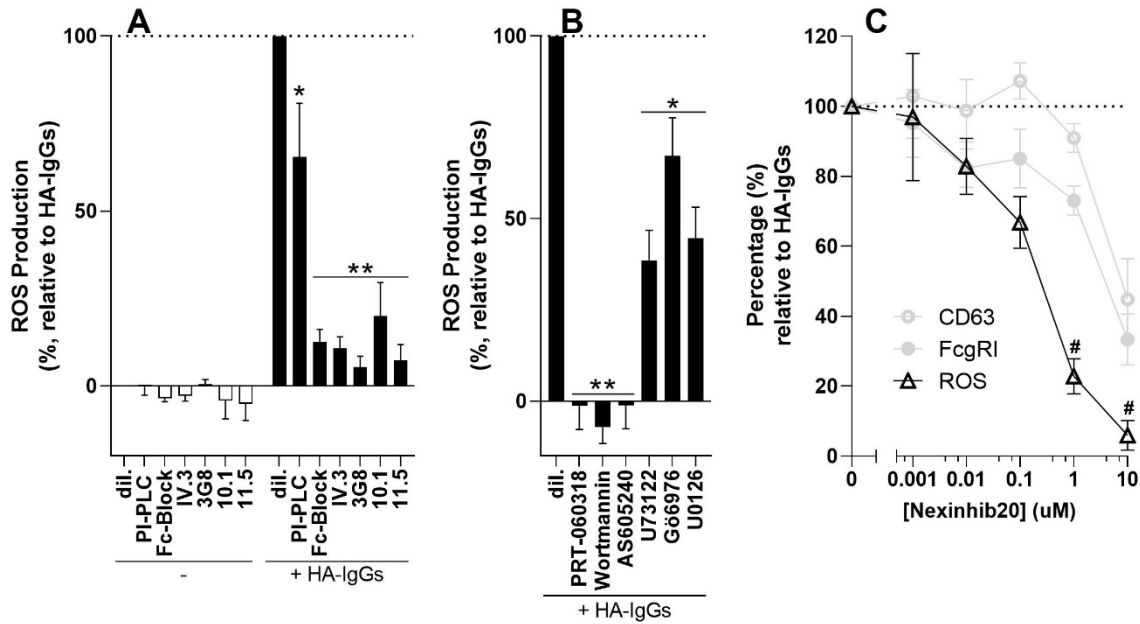

**Figure 5. FcγRI activation contributes to the production of reactive oxygen species.** A) Neutrophils were incubated with (A) PI-PLC, Fc-Block, indicated antibodies, or (B) with indicated pharmacological inhibitors, or C) with indicated concentrations of Nexinhib20 for 15 min, before stimulation with HA-IgGs. ROS production was measured by luminescence intensity (luminol). Results are expressed as the percentage of ROS production, relative to HA-IgGs alone (dil., black bar). Mean ± SEM, n=4. \*Significantly lower than HA-IgGs alone. \*p<0.05, \*\*p<0.0001. #Significantly lower than CD63 and FcγRI (Panel C: pale gray data was reproduced from Fig. 3C, for easier comparison).

Huot et al.

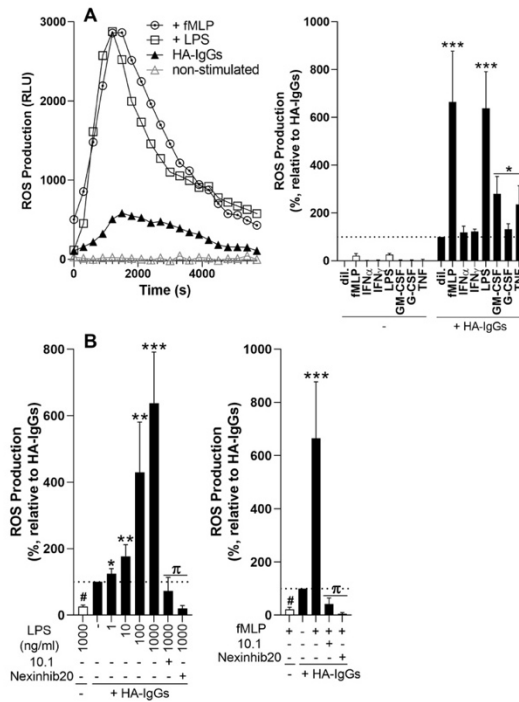

**Figure 6. Combinations of fMLP or LPS with HA-IgGs magnify ROS production.** Neutrophils were incubated with indicated agonists for 10 min (37°C) before stimulation with HA-IgGs. ROS production was determined. **A**) Typical traces of combinations with fMLP and LPS, representative of n=3 experiments, are shown. **B**) Neutrophils were incubated with indicated concentrations of LPS, or with fMLP (100 nM), then stimulated with HA-IgGs. Bar graphs: Results are expressed as the percentage of ROS production relative to HA-IgGs alone (dil., black bar) and are the mean  $\pm$  SEM, n=3. Significantly lower<sup>#</sup> or higher\* than HA-IgGs alone (\*p<0.05, \*\*p<0.01, \*\*\*p<0.001). Significantly lower<sup>π</sup> than HA-IgGs+LPS (or +fMLP) p<0.01.

Huot et al.

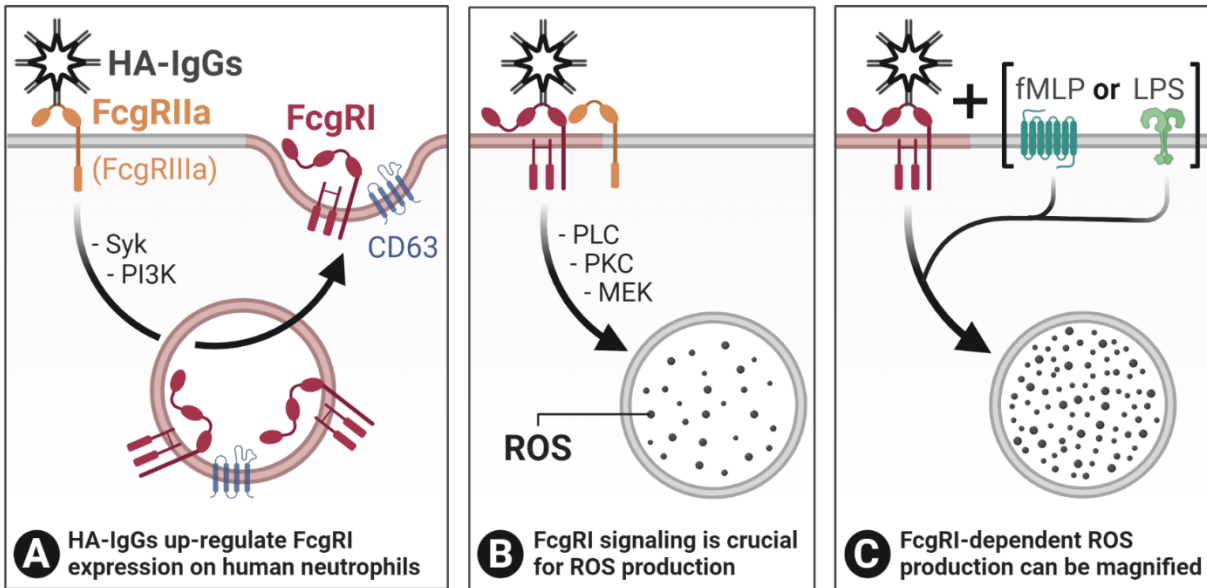

**Figure 7. Schematics: HA-IgGs rapidly up-regulate FcγRI expression at the surface of human neutrophils in a FcγRII-dependent fashion and contribute to ROS production. A)** Binding of HA-IgGs to FcγRIIa (and, possibly, FcγRIIIa) up-regulate FcγRI surface expression on human neutrophils, from CD63 positive, primary granules, in a Syk and PI3K-dependent fashion. **B)** Up-regulation and engagement of FcγRI by HA-IgGs is necessary for intracellular ROS production and involves PLC, PKC, and MEK. **C)** **In the presence of bacterial components such as LPS or fMLP**, ROS production by HA-IgGs-FcγRI complexes is potentiated. Abbreviations: HA-IgGs; heat-aggregated IgGs, fMLP; formyl-methionyl-leucyl phenylalanine, LPS; lipopolysaccharide, MEK; mitogen-activated protein (MAP)/ERK kinase, PI3K; phosphatidylinositol 3-kinase, PLC; phospholipase C, PKC; protein kinase C, ROS; reactive oxygen species, Syk; Spleen tyrosine kinase. *Created with BioRender.com*

Huot et al.

| Marker               | Relative Fluorescence Intensity | p value      |
|----------------------|---------------------------------|--------------|
| CD10                 | 1.69±0.16 *                     | 0.037        |
| CD15                 | 1.48±0.13 *                     | 0.048        |
| CD11b                | 1.29±0.08 *                     | 0.023        |
| CD11b <sup>act</sup> | 1.61±0.21 *                     | 0.045        |
| CD66b                | 1.02±0.09                       | 0.884        |
| <b>CD63</b>          | <b>3.99±0.55 *</b>              | <b>0.001</b> |
| <b>FcgRI (CD64)</b>  | <b>4.61±0.79 *</b>              | <b>0.009</b> |
| FcgRII (CD32)        | 0.65±0.11*                      | 0.004        |
| FcgRIII (CD16)       | 0.79±0.14 *                     | 0.048        |

**Table 1.** Impact of heat-aggregated (HA)-IgGs on neutrophil surface markers. Human neutrophils were incubated with HA-IgGs (1 mg/ml, 30 min, 37°C), and surface markers were monitored by flow cytometry, as described in *Methods*. Markers of the following parameters were measured: maturity and adhesion (CD10, CD15); adhesion and migration (total, and activated form (<sup>act</sup>) of CD11b); degranulation of primary (CD63), secondary (CD66b, CD11b), tertiary, and secretory vesicles (CD11b); Fc gamma receptors FcgRI (CD64), FcgRII (CD32), and FcgRIII (CD16). FcgRI and CD63 were most up-regulated (in Bold), both in a comparable fashion. For each marker, results are expressed as the ratio obtained from mean fluorescence intensity after incubations with HA-IgGs, relative to non-stimulated cells. Mean ± SEM (n=4 experiments). \*p<0.05

Huot et al.

| <b>Compound</b> | <b>Molecular target</b> | <b>Final conc.</b> | <b>Solvent</b> |
|-----------------|-------------------------|--------------------|----------------|
| Cycloheximide   | Protein synthesis       | 10 µg/ml           | EtOH           |
| Actinomycin D   | Transcription           | 2 µg/ml            | DMSO           |
| PP-2            | Src family of kinase    | 10 µM              | DMSO           |
| Wortmannin      | PI3K                    | 200 nM             | DMSO           |
| AS605240        | PI3K                    | 10 µM              | DMSO           |
| U73122          | PLC                     | 10 µM              | DMSO           |
| Gö6976          | PKCa, PKCb <sub>1</sub> | 1 µM               | DMSO           |
| U0126           | MEK1/2                  | 10 µM              | DMSO           |
| PRT-060318      | Syk                     | 10 µM              | HBSS           |
| SB216763        | GSK-3α                  | 10 µM              | DMSO           |
| Nexinhib20      | Rab27a-JFC1 interaction | 10 µM              | DMSO           |
| 10.1            | FcgRI (CD64)            | 3 µg/ml            | Aqueous buffer |
| IV.3            | FcgRIIa (CD32a)         | 2.5 µg/ml          | Aqueous buffer |
| 3G8             | FcgRIII (CD16)          | 4 µg/ml            | Aqueous buffer |
| 11.5            | FcgRIIIb (CD16b)        | 2.5 µg/ml          | Aqueous buffer |
| PI-PLC          | FcgRIIIb (CD16b)        | 0.5 U/ml           | Aqueous buffer |
| Fc-Block        | Fc receptors            | 2.5 mg/100 µl      | Aqueous buffer |

**Table 2.** List of compounds, their molecular target, concentrations, and diluting buffers.

Huot et *al.*

| <b>Agonist</b> | <b>Final conc.</b> |
|----------------|--------------------|
| TNF            | 100 ng/ml          |
| GM-CSF         | 1.4 nM             |
| G-CSF          | 1.4 nM             |
| IFN $\alpha$   | 1000 U/ml          |
| IFN $\gamma$   | 100 ng/ml          |
| LPS            | 1 $\mu$ g/ml       |
| fMLP           | 100 nM             |
| PMA            | 10 nM              |

**Table 3.** List of agonists and final concentrations.
